# Supplementary material for: The Effect of Metal Ratio and Precipitation Agent on Highly Active Iron-Manganese Mixed Metal Oxide Catalysts for Propane Total Oxidation
Source: MDPI journal article supplement (doi:10.3390/catal13050794), 2023-04-23
Supplement: s1 [file s1]

## Supplementary Materials

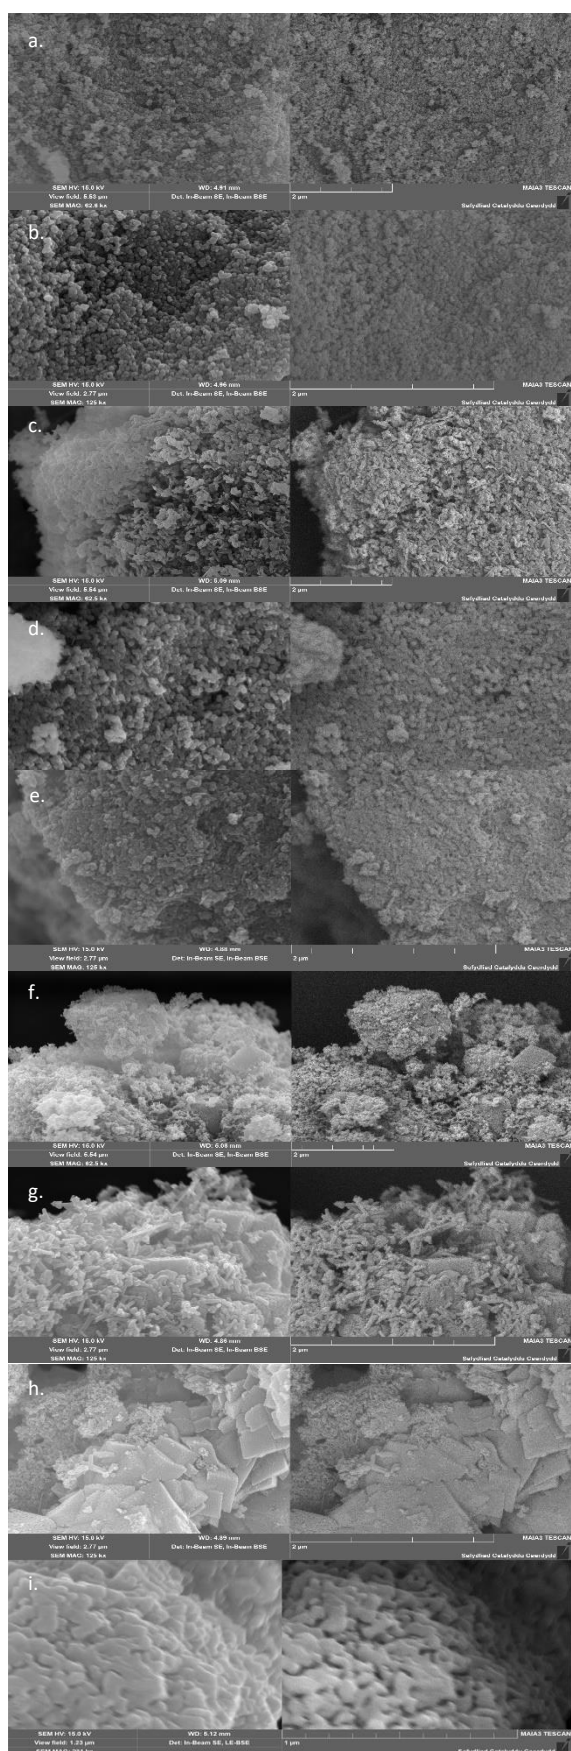

Figure S1: SEM images of (a.)  $\text{FeO}_x$ , (b.)  $\text{Fe}_{0.99}\text{Mn}_{0.01}\text{O}_x$ , (c.)  $\text{Fe}_{0.90}\text{Mn}_{0.10}\text{O}_x$ , (d.)  $\text{Fe}_{0.80}\text{Mn}_{0.20}\text{O}_x$ , (e.)  $\text{Fe}_{0.50}\text{Mn}_{0.50}\text{O}_x$ , (f.)  $\text{Fe}_{0.20}\text{Mn}_{0.80}\text{O}_x$ , (g.)  $\text{Fe}_{0.10}\text{Mn}_{0.90}\text{O}_x$ , (h.)  $\text{Fe}_{0.01}\text{Mn}_{0.99}\text{O}_x$ , (i.)  $\text{MnO}_x$ . Left image obtained using secondary electrons, right image obtained using backscattered electrons.

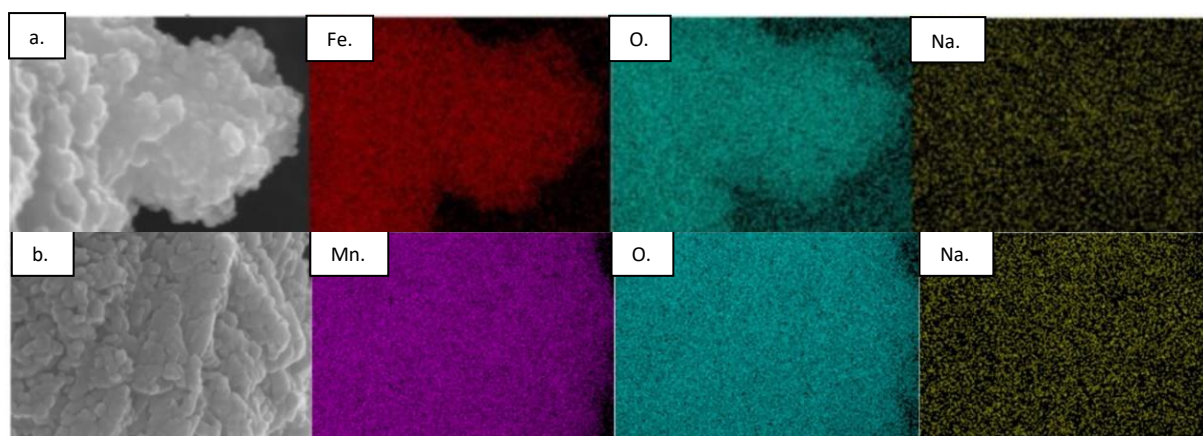

Figure S2: SEM-EDX images of (a.)  $\text{FeO}_x$  and (b.)  $\text{MnO}_x$

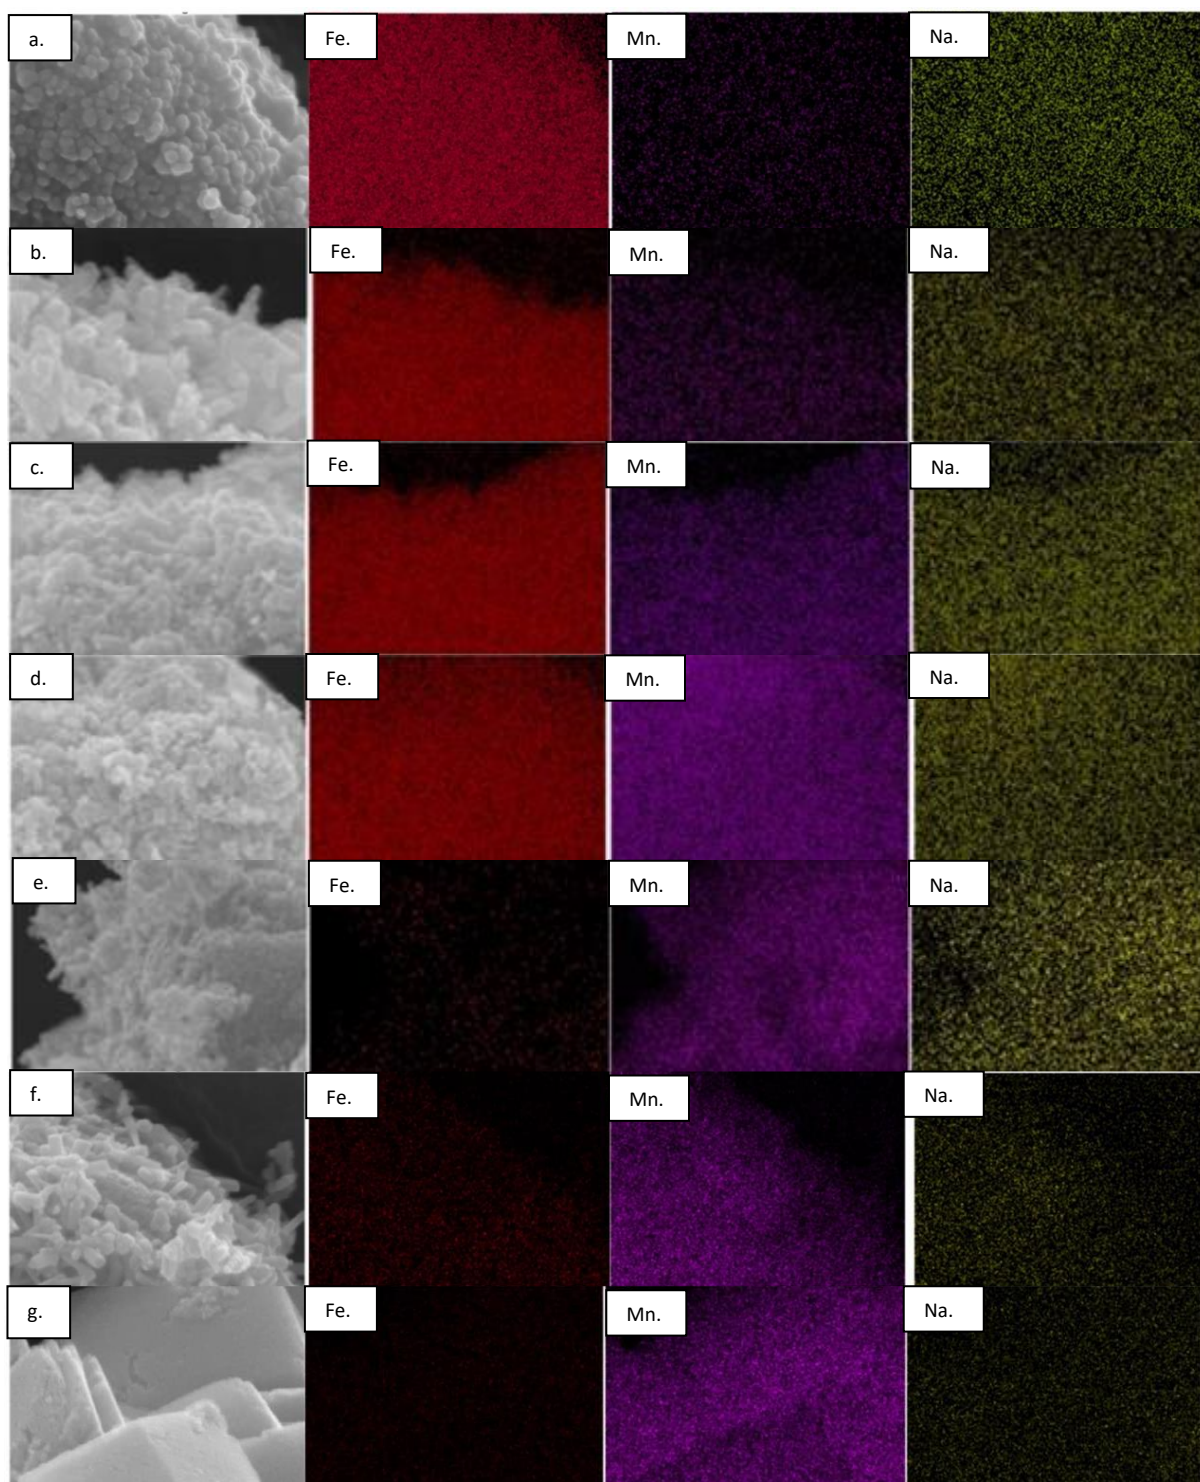

Figure S3: SEM-EDX mapping of (a)  $\text{Fe}_{0.99}\text{Mn}_{0.01}\text{O}_x$ , (b)  $\text{Fe}_{0.90}\text{Mn}_{0.10}\text{O}_x$ , (c)  $\text{Fe}_{0.80}\text{Mn}_{0.20}\text{O}_x$ , (d)  $\text{Fe}_{0.50}\text{Mn}_{0.50}\text{O}_x$ , (e)  $\text{Fe}_{0.20}\text{Mn}_{0.80}\text{O}_x$ , (f)  $\text{Fe}_{0.10}\text{Mn}_{0.90}\text{O}_x$ , (g)  $\text{Fe}_{0.01}\text{Mn}_{0.99}\text{O}_x$



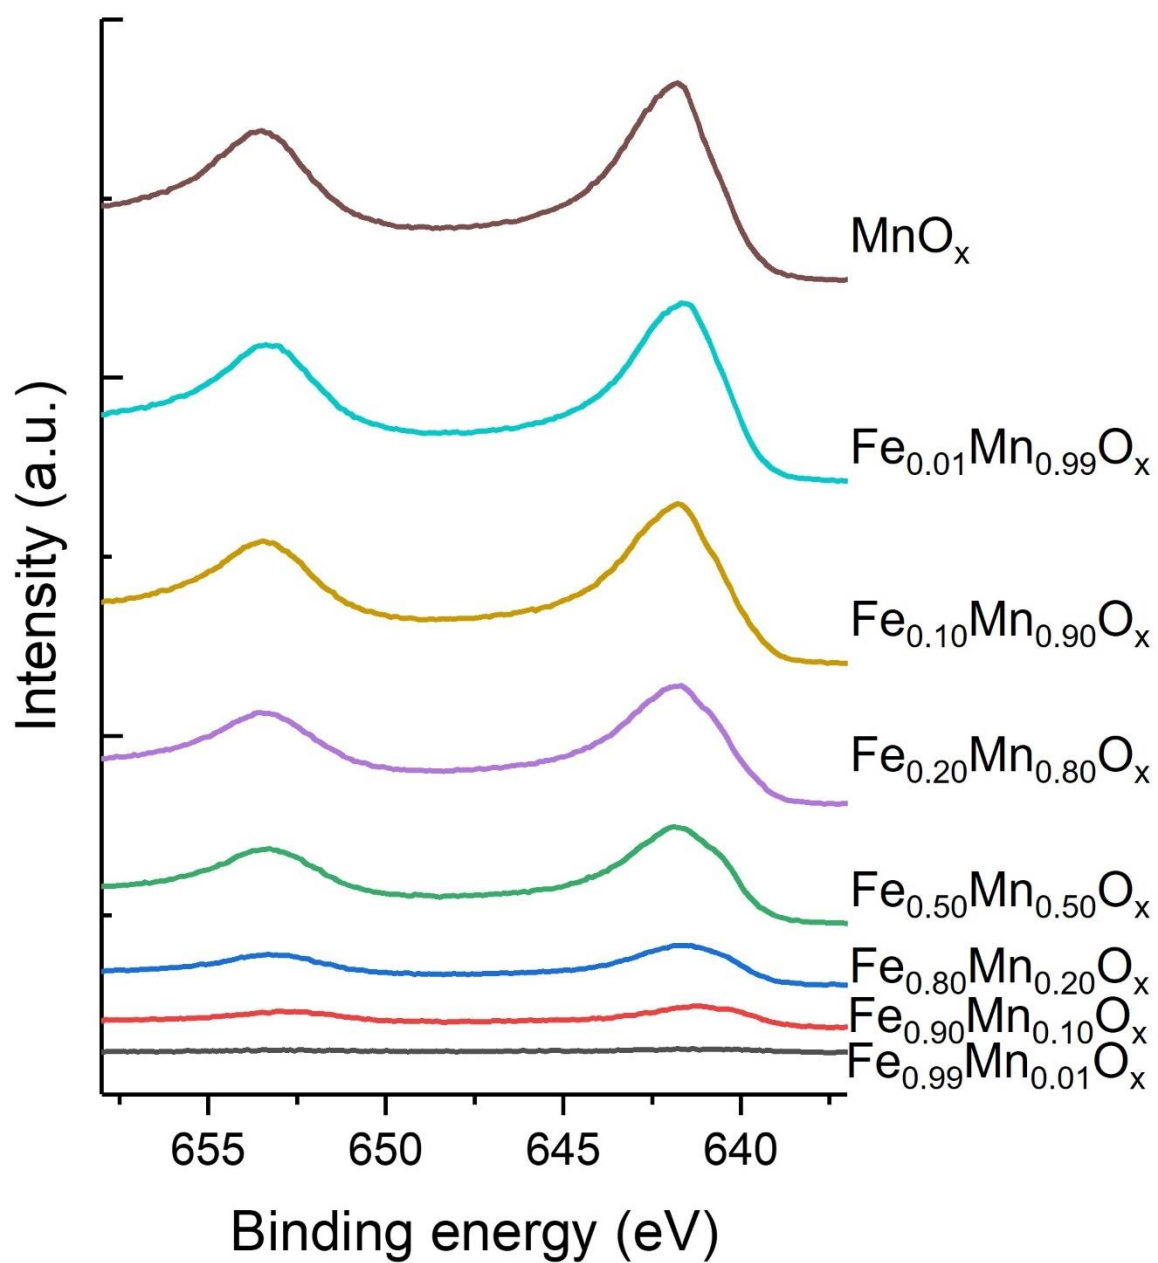

Figure S4: Mn 2p XPS spectra for the iron-manganese mixed metal oxide catalysts

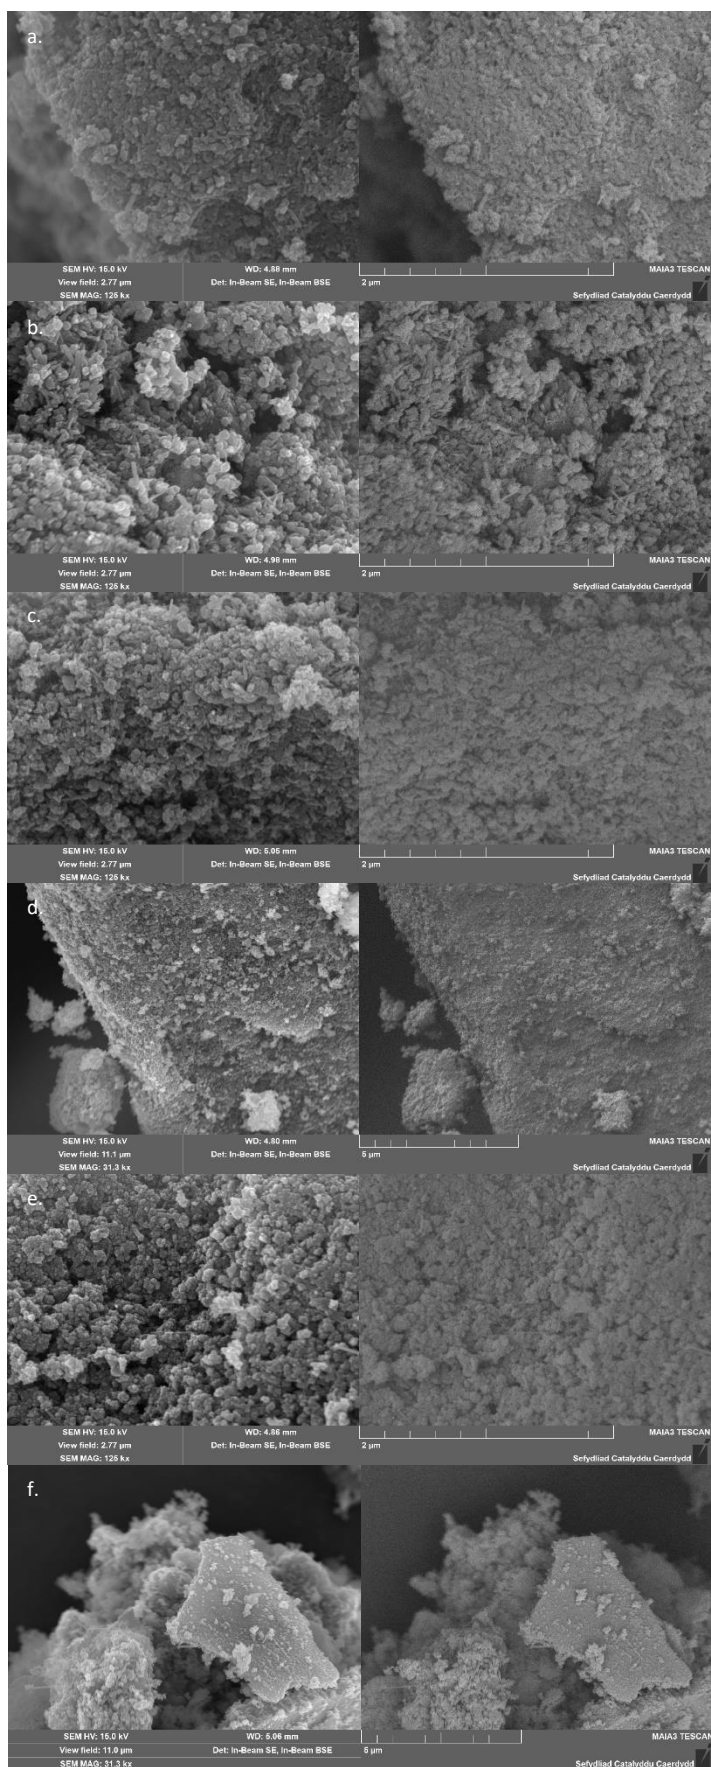

Figure S5: SEM images of the  $\text{Fe}_{0.50}\text{Mn}_{0.50}\text{O}_x$  prepared using (a)  $\text{Na}_2\text{CO}_3$ , (b)  $\text{K}_2\text{CO}_3$ , (c)  $(\text{NH}_4)_2\text{CO}_3$ , (d)  $\text{NaOH}$ , (e)  $\text{KOH}$  and (f)  $\text{NH}_4\text{OH}$ . Left image obtained using secondary electrons, right image obtained using backscattered electrons.

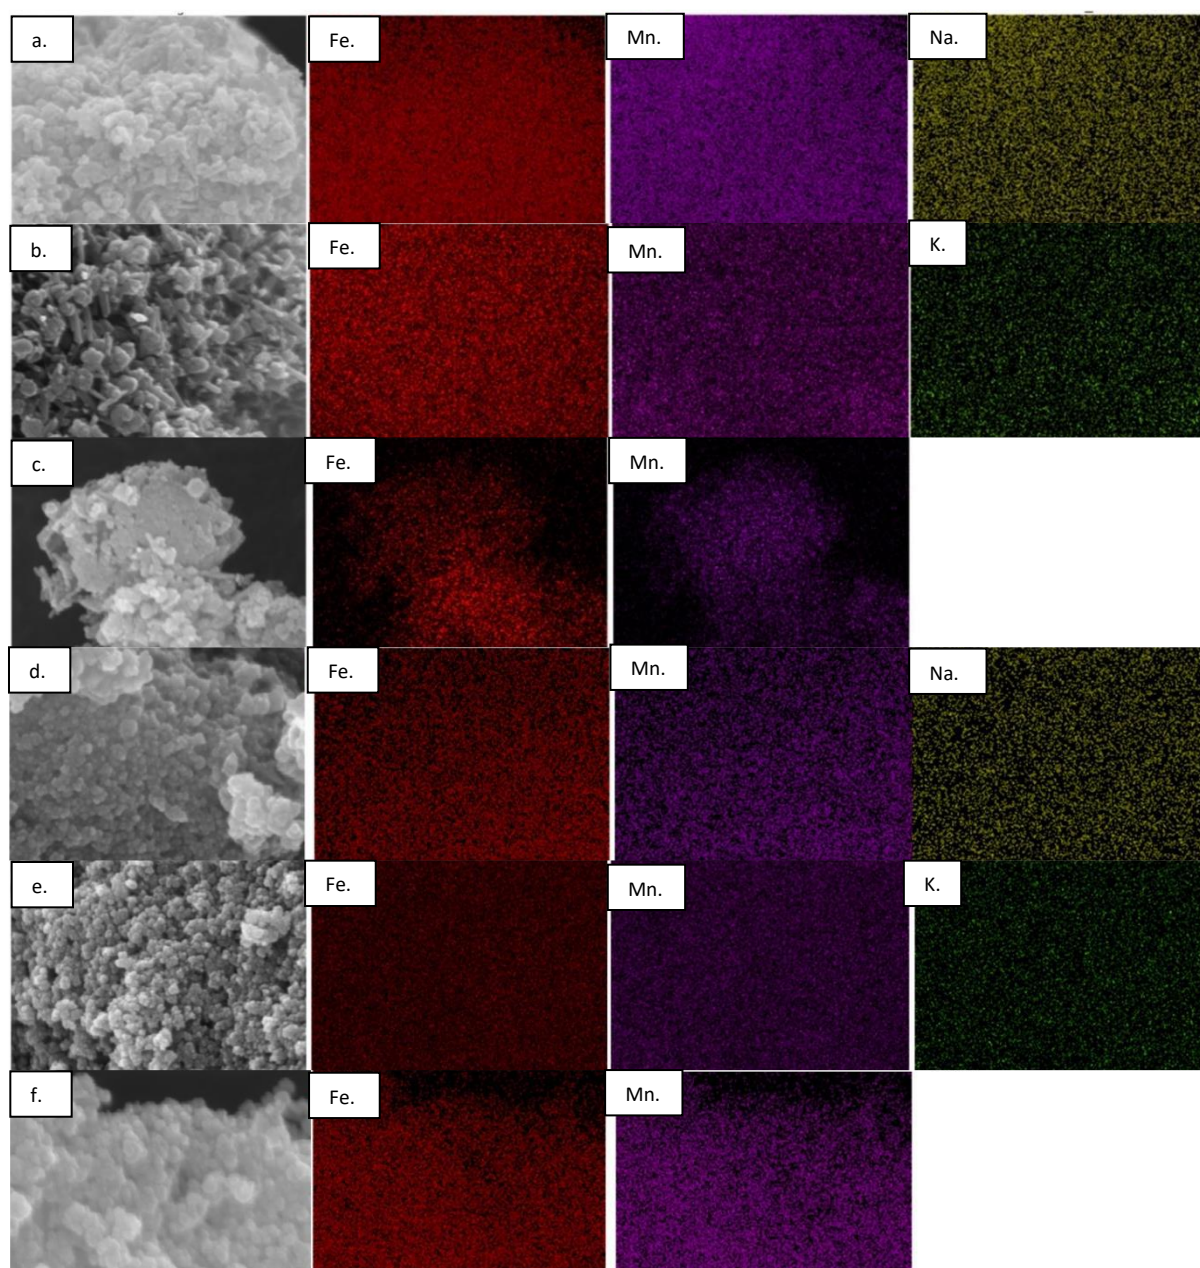

Figure S6: SEM-EDX mapping of  $\text{Fe}_{0.50}\text{Mn}_{0.50}\text{O}_x$  prepared via co-precipitation using different precipitating agents : (a)  $\text{Na}_2\text{CO}_3$ , (b)  $\text{K}_2\text{CO}_3$ , (c)  $(\text{NH}_4)_2\text{CO}_3$ , (d)  $\text{NaOH}$ , (e)  $\text{KOH}$  and (f)  $\text{NH}_4\text{OH}$

Table S1: Elemental surface composition for the  $\text{Fe}_{0.50}\text{Mn}_{0.50}\text{O}_x$  catalysts prepared using different precipitating agents derived from XPS data.

| Sample                       | Surface concentration (%) |      |      |     |     | Relative surface Fe (%) | Relative Surface Mn (%) |
|------------------------------|---------------------------|------|------|-----|-----|-------------------------|-------------------------|
|                              | Fe                        | Mn   | O    | K   | Na  |                         |                         |
| $\text{Na}_2\text{CO}_3$     | 13.6                      | 18.9 | 62.6 | -   | 4.9 | 42.0                    | 58.0                    |
| $\text{K}_2\text{CO}_3$      | 21.4                      | 18.6 | 60.1 | 4.9 | -   | 53.5                    | 46.5                    |
| $(\text{NH}_4)_2\text{CO}_3$ | 21.5                      | 19.1 | 59.5 | -   | -   | 53.0                    | 47.0                    |
| $\text{NaOH}$                | 21.4                      | 19.0 | 59.3 | -   | 0.4 | 53.0                    | 47.0                    |
| $\text{KOH}$                 | 20.1                      | 14.2 | 64.7 | 1.1 | -   | 58.6                    | 41.4                    |
| $\text{NH}_4\text{OH}$       | 20.3                      | 20.3 | 59.4 | -   | -   | 50.1                    | 49.9                    |
